# Supplementary material
Source: PubMed Central journal article supplement (PMC1820647)

# <sup>19</sup>F NMR Spectrum

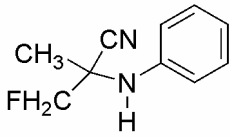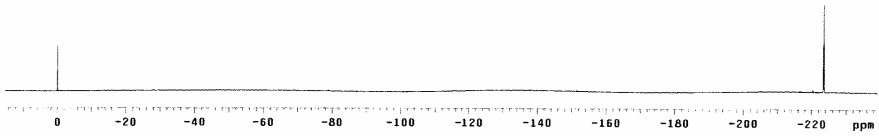

# <sup>1</sup>H NMR Spectrum

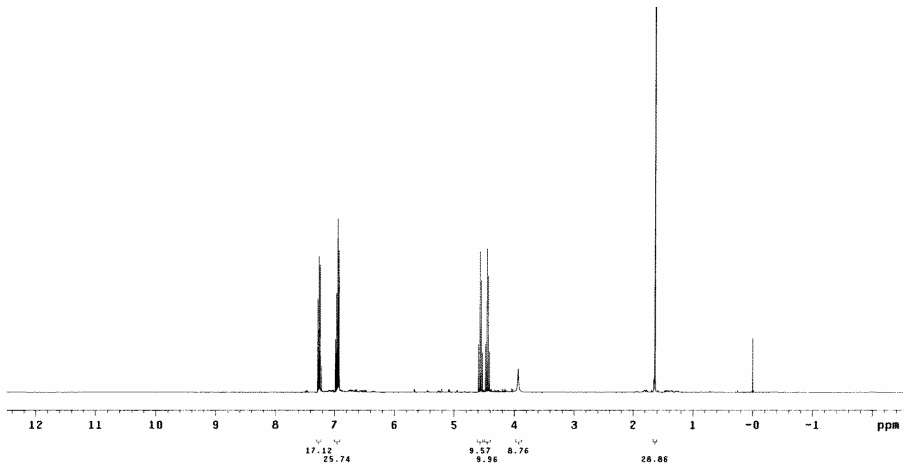

# <sup>13</sup>C NMR Spectrum

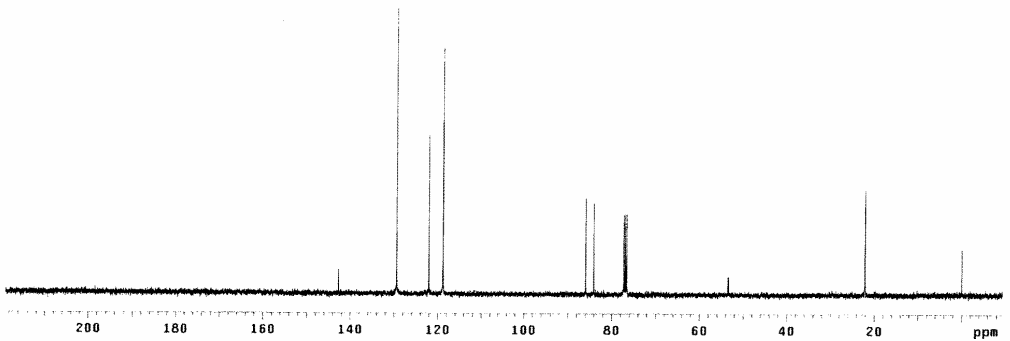

Supplement: pnas_0611316104_2.pdf [file pnas_0611316104_2.pdf]

# <sup>19</sup>F NMR Spectrum

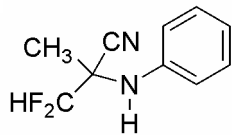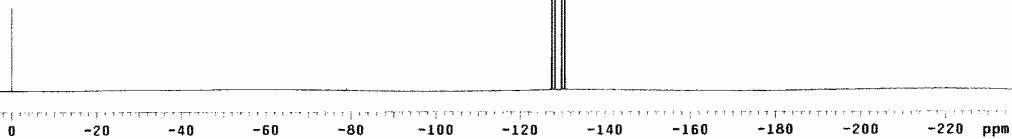

# <sup>1</sup>H NMR Spectrum

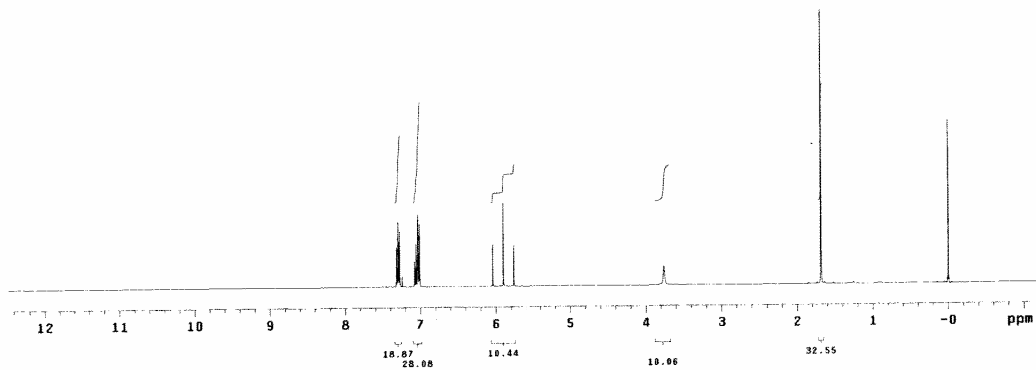

# <sup>13</sup>C NMR Spectrum

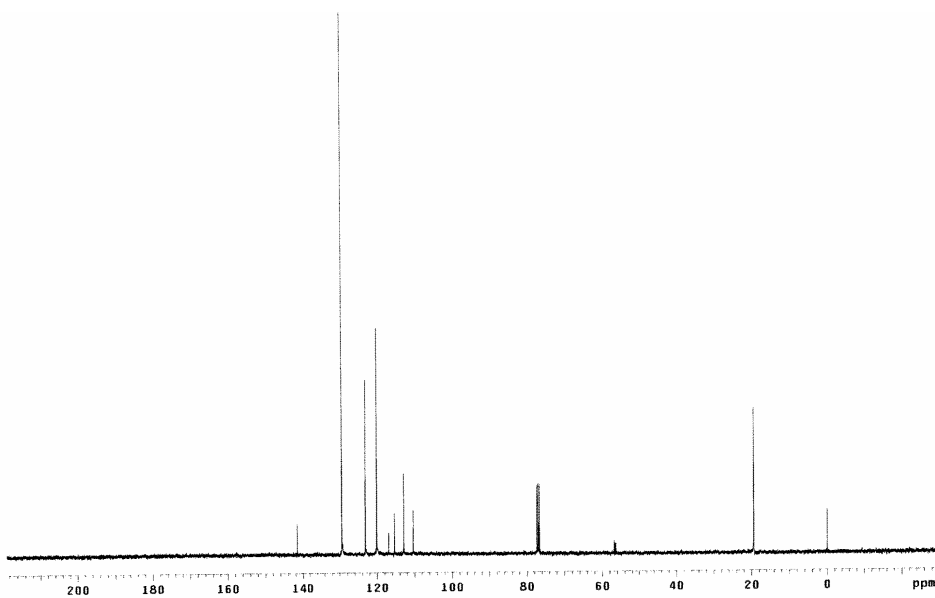

Supplement: pnas_0611316104_3.pdf [file pnas_0611316104_3.pdf]

# $^{19}\text{F}$ NMR Spectrum

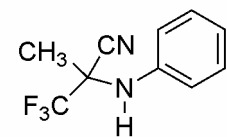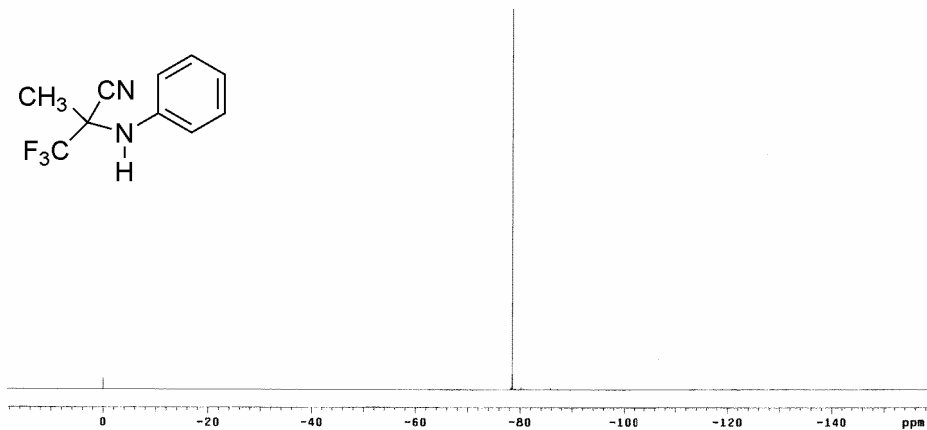

# $^1\text{H}$ NMR Spectrum

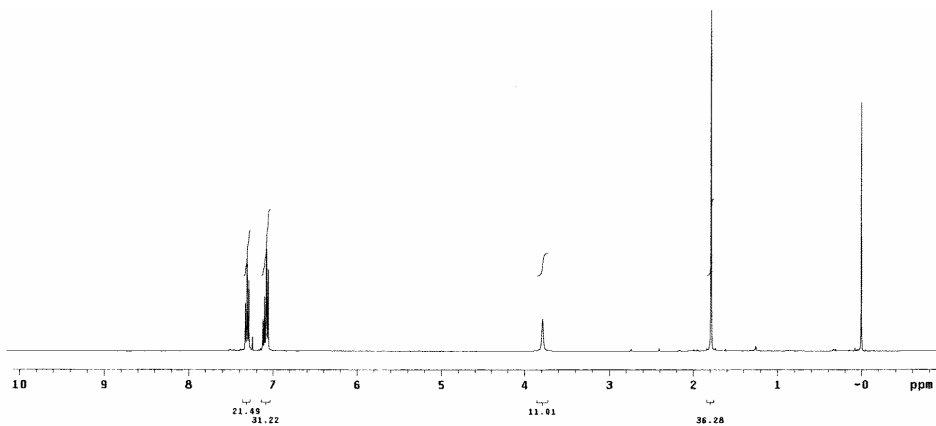

# $^{13}\text{C}$ NMR Spectrum

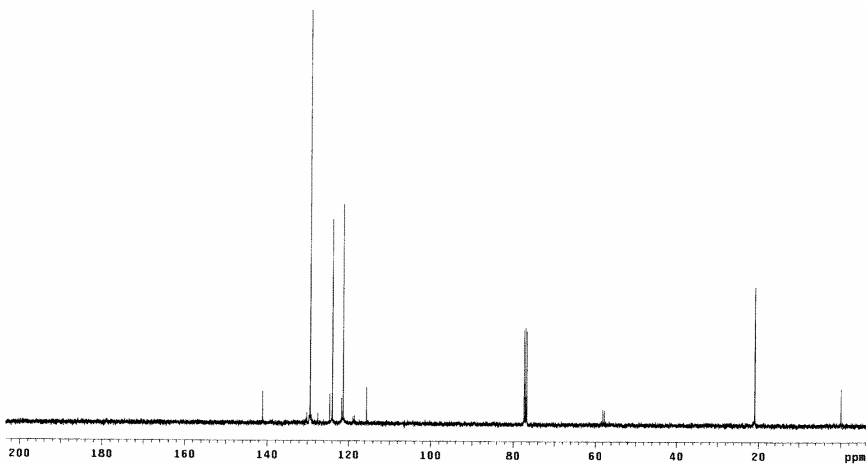

Supplement: pnas_0611316104_4.pdf [file pnas_0611316104_4.pdf]
